# Supplementary material for: Genome-Wide Profiling of Yeast DNA:RNA Hybrid Prone Sites with DRIP-Chip
Source: PLoS Genet. 2014 Apr 17;10(4):e1004288. doi: 10.1371/journal.pgen.1004288 (PMC3990523; doi:10.1371/journal.pgen.1004288)
Supplement: Dataset S3 — sen1-1 replicate 1 enriched region coordinates. (XLSX) [file pgen.1004288.s003.xlsx]

## Sheet: sen1-1 replicate 1
Chromosome number	Start coordinates	End coordinates	Score
chr1	0	2614	15.1575
chr1	3150	3358	3.66469
chr1	7985	8119	2.19591
chr1	10897	10933	1.80102
chr1	11558	14350	14.1435
chr1	15479	15804	4.38315
chr1	16271	16463	3.05587
chr1	16798	16850	2.36461
chr1	18612	18975	6.32313
chr1	19391	19987	6.12786
chr1	20352	20935	4.07119
chr1	22425	22513	3.21681
chr1	23218	23482	2.56353
chr1	23989	28368	12.8941
chr1	31214	32312	3.42658
chr1	33248	33944	2.9218
chr1	34264	34480	2.81813
chr1	35472	35745	4.57976
chr1	36968	37164	3.27537
chr1	37904	38172	4.56073
chr1	40386	40437	2.18038
chr1	41249	42913	6.7828
chr1	44939	45217	2.94847
chr1	45606	45867	3.58638
chr1	46333	47221	4.58417
chr1	47651	47837	3.70919
chr1	48141	48273	2.54448
chr1	48927	49059	2.57364
chr1	50400	50627	1.95877
chr1	50963	51055	2.58431
chr1	51602	52088	2.89477
chr1	52442	52495	2.33854
chr1	53098	53732	5.34234
chr1	56717	57365	3.49224
chr1	57839	58936	7.38013
chr1	59248	60696	5.07857
chr1	61657	61754	1.79503
chr1	62332	62898	4.82417
chr1	64133	64231	1.71679
chr1	65315	66295	7.56028
chr1	67448	67948	6.60999
chr1	69073	69986	5.72889
chr1	70544	70591	2.74237
chr1	71197	73408	16.7726
chr1	74421	74597	2.7094
chr1	76045	77926	7.14441
chr1	78497	78919	5.94448
chr1	79309	80027	4.23745
chr1	80474	80596	2.46634
chr1	81049	81368	5.41001
chr1	82450	82532	2.2378
chr1	82997	83131	1.59085
chr1	83851	84406	7.07244
chr1	85240	85766	2.98268
chr1	87401	87766	3.92179
chr1	91283	91579	2.61108
chr1	92973	93764	3.23819
chr1	94289	94671	6.43946
chr1	96471	96584	2.58523
chr1	97206	97366	2.29266
chr1	98360	98599	3.03216
chr1	99508	99632	2.02384
chr1	100179	101103	6.67421
chr1	102450	102731	4.84444
chr1	103513	103669	3.40145
chr1	104909	105166	3.99642
chr1	106141	106414	3.07231
chr1	106989	107688	6.28575
chr1	108207	108235	2.2566
chr1	109386	109666	2.29705
chr1	109981	111271	5.355
chr1	112064	113429	7.16299
chr1	114458	114752	4.35758
chr1	115243	116917	4.20973
chr1	117426	117589	4.4602
chr1	118130	118400	2.64903
chr1	118974	119162	2.1173
chr1	121899	122689	3.24686
chr1	123849	125115	3.65464
chr1	125860	126003	2.82686
chr1	126429	127591	3.42461
chr1	128032	128164	2.73996
chr1	128529	129205	5.0058
chr1	129600	129922	2.84409
chr1	130978	131925	4.45504
chr1	132530	132997	4.24309
chr1	133303	133642	5.82735
chr1	135345	136414	4.67136
chr1	136753	136869	2.21116
chr1	137212	137323	1.81731
chr1	139018	139284	3.44792
chr1	139607	141285	7.88035
chr1	142017	143212	6.87139
chr1	143905	144076	3.56143
chr1	144951	145019	1.86767
chr1	145448	145732	3.22087
chr1	147305	147519	3.14721
chr1	149156	149261	1.92645
chr1	150547	151028	5.2652
chr1	152324	153174	5.42123
chr1	153704	154797	4.28956
chr1	155827	156149	3.09098
chr1	158602	159181	3.48711
chr1	159510	166670	27.5089
chr1	167266	167643	3.51953
chr1	168002	168937	4.62554
chr1	169443	169644	2.52904
chr1	170499	170547	2.00605
chr1	170927	170979	2.05922
chr1	173321	173458	2.37922
chr1	174171	175344	4.24432
chr1	176621	177004	3.22704
chr1	177493	177794	4.05918
chr1	178112	178678	3.50062
chr1	180276	181479	8.4869
chr1	182182	184136	15.3874
chr1	185229	185439	2.87744
chr1	186720	186885	3.03065
chr1	187323	189875	12.4391
chr1	192120	192212	3.21087
chr1	193788	194072	5.08123
chr1	198041	198175	3.83803
chr1	201165	201320	3.07967
chr1	203445	208154	9.86867
chr1	208598	208692	2.00991
chr1	209149	209285	2.69594
chr1	209725	210126	3.671
chr1	210680	212693	8.58345
chr1	213016	213378	3.44333
chr1	213741	213881	2.55189
chr1	214233	215776	6.89896
chr1	216270	217097	4.15279
chr1	217462	225532	10.65
chr1	225952	227221	6.6991
chr1	227540	230182	7.46485
chr10	0	10866	19.8227
chr10	11578	12151	4.42385
chr10	12490	13701	5.06813
chr10	14040	21211	11.4799
chr10	22307	22561	3.71456
chr10	23361	23505	2.15098
chr10	23876	24153	2.8706
chr10	27361	27908	6.05737
chr10	28499	28674	1.85017
chr10	29110	29265	3.0275
chr10	30505	30644	2.18377
chr10	31495	31681	2.01229
chr10	32261	32533	3.21883
chr10	33577	34444	5.0232
chr10	36097	36642	3.93993
chr10	37256	37879	3.57587
chr10	38263	38475	2.93792
chr10	39802	40114	3.67726
chr10	46959	47115	3.23525
chr10	49778	50587	2.40417
chr10	53593	53669	2.08563
chr10	55525	55877	5.35409
chr10	57249	57428	2.4706
chr10	58289	59471	7.67261
chr10	59888	60436	3.2943
chr10	61136	61181	2.13262
chr10	62275	63393	7.32181
chr10	63957	64498	3.77244
chr10	66211	66461	4.90985
chr10	67088	67449	5.32883
chr10	70205	70253	1.79074
chr10	70944	71088	3.08643
chr10	72549	72625	2.99152
chr10	73698	73779	2.00258
chr10	74282	74965	4.01013
chr10	75838	76061	3.27433
chr10	76793	76975	3.4429
chr10	77483	78614	4.12499
chr10	79161	79526	4.31541
chr10	81261	81357	1.96971
chr10	81806	82099	4.74076
chr10	83797	83997	2.7125
chr10	88541	88692	3.63974
chr10	90571	90627	1.89217
chr10	90982	92084	6.61994
chr10	93519	94692	7.04841
chr10	95193	95354	1.78983
chr10	96001	96164	3.08767
chr10	96834	97173	6.25124
chr10	97612	98025	3.98564
chr10	98900	98968	1.74745
chr10	99329	99557	3.79771
chr10	101142	101376	2.47183
chr10	101729	101765	1.98291
chr10	102565	102780	2.62554
chr10	103655	104512	5.83928
chr10	105071	106185	6.28973
chr10	107741	108570	5.65289
chr10	109314	109578	4.40892
chr10	110865	111093	3.94235
chr10	112712	113187	6.01027
chr10	114381	115002	2.59461
chr10	115655	117132	11.8486
chr10	119249	119329	2.26319
chr10	120438	121529	14.5171
chr10	122384	122735	4.96102
chr10	123990	124499	3.26526
chr10	124845	125457	5.96436
chr10	125996	126346	3.90248
chr10	127080	127725	2.87406
chr10	128443	128712	2.80319
chr10	129410	129608	2.74814
chr10	131169	131609	2.78087
chr10	133703	133747	2.17266
chr10	134057	134167	3.21151
chr10	135270	135582	2.48001
chr10	135909	136863	6.23673
chr10	137899	138100	3.70327
chr10	138534	139806	5.93327
chr10	140718	141272	8.46614
chr10	142642	143414	5.60948
chr10	144459	144725	3.6548
chr10	145600	146636	5.93817
chr10	147003	147653	6.25167
chr10	148052	148342	3.36299
chr10	149668	149696	1.70006
chr10	150024	151008	5.75397
chr10	151708	151776	1.7267
chr10	153086	154396	7.23644
chr10	155351	155392	2.0006
chr10	155771	156035	2.19719
chr10	158652	159422	5.89722
chr10	159924	160413	4.35961
chr10	161136	161239	1.81684
chr10	163719	163759	1.60949
chr10	164984	165151	3.39565
chr10	165921	165985	2.4615
chr10	166313	166366	2.31573
chr10	166929	166980	2.09747
chr10	167563	167822	3.05746
chr10	170728	170772	1.77502
chr10	172185	173064	5.87959
chr10	173557	174262	5.83706
chr10	174772	174975	2.88705
chr10	175388	175900	6.95268
chr10	176233	177216	8.09157
chr10	177708	178520	4.59513
chr10	179351	179472	1.65081
chr10	180089	181690	7.66301
chr10	182538	183050	7.49704
chr10	183553	183778	3.62628
chr10	184187	184463	3.00747
chr10	184967	186317	4.8266
chr10	186820	189478	6.65542
chr10	190020	190230	3.76846
chr10	190798	192651	7.00305
chr10	193036	194790	5.39693
chr10	195300	195927	3.99237
chr10	196566	198224	13.8971
chr10	199558	200339	5.60462
chr10	200868	202595	4.43346
chr10	203132	205110	21.0741
chr10	207278	207545	3.68936
chr10	208279	208358	2.35892
chr10	208888	208928	1.81113
chr10	210164	211046	4.82308
chr10	218480	218632	2.43701
chr10	219576	219987	5.2641
chr10	220702	221039	3.0336
chr10	222752	222799	2.19161
chr10	224603	225512	4.67014
chr10	226177	226491	2.87043
chr10	227263	227899	4.30087
chr10	228214	228324	1.99285
chr10	229771	230069	4.03241
chr10	230450	230736	3.21834
chr10	231130	231266	2.46185
chr10	233133	233305	2.85234
chr10	233950	234102	2.46876
chr10	235939	236358	4.78937
chr10	236913	236949	1.73404
chr10	237740	237914	1.9866
chr10	238354	238568	3.38996
chr10	240460	240818	2.91047
chr10	242574	243266	3.50042
chr10	244307	244395	2.79981
chr10	244977	245687	4.58599
chr10	247039	247159	2.36651
chr10	248306	248415	2.83605
chr10	249677	249877	3.24197
chr10	250589	250837	3.00887
chr10	251270	251398	2.11661
chr10	252453	252761	4.55902
chr10	254264	254310	1.80212
chr10	255443	255580	2.24661
chr10	256049	256189	1.8705
chr10	259087	259671	5.43159
chr10	260255	260848	6.09009
chr10	262341	262659	2.62006
chr10	263484	263691	3.23267
chr10	264159	264211	1.92091
chr10	265733	265988	2.5983
chr10	267898	268165	2.91112
chr10	268528	268731	4.04098
chr10	270734	270813	2.39228
chr10	277000	277088	1.83866
chr10	278219	278535	3.90916
chr10	279269	280948	4.46616
chr10	282450	282662	2.84037
chr10	285140	285235	2.40207
chr10	286589	286865	3.11104
chr10	289121	289165	2.11227
chr10	289532	289736	1.9279
chr10	290048	293376	11.8357
chr10	295429	296120	2.99372
chr10	296511	297044	3.31262
chr10	297346	297586	4.27963
chr10	297923	298240	2.65525
chr10	298714	298750	2.39091
chr10	305725	305853	2.7322
chr10	307656	308138	3.88354
chr10	311822	312791	2.99925
chr10	313250	313478	3.57612
chr10	313796	317953	10.2884
chr10	318676	319150	3.04241
chr10	321552	321785	3.87635
chr10	324142	324218	2.5167
chr10	324772	324800	2.30055
chr10	325147	325183	2.18323
chr10	326401	326471	1.95998
chr10	327124	327358	1.97528
chr10	328391	329161	4.40288
chr10	330879	331005	2.23658
chr10	333360	333960	6.28144
chr10	336433	336708	3.12144
chr10	337814	339194	15.9969
chr10	339657	339818	2.38801
chr10	341666	342564	3.03213
chr10	343250	343518	3.68763
chr10	343915	344561	3.0991
chr10	346678	347317	6.70465
chr10	348486	349003	2.97351
chr10	350286	351004	3.18307
chr10	352082	352295	2.02253
chr10	353930	355716	16.4767
chr10	357022	357259	3.06718
chr10	357671	358196	3.97871
chr10	358594	358743	2.55713
chr10	360992	361180	3.66611
chr10	362334	362655	4.37079
chr10	362976	363172	2.57201
chr10	364156	364236	2.40618
chr10	365062	365429	5.83771
chr10	366063	366974	2.70512
chr10	367283	367862	2.66335
chr10	372191	373152	3.90572
chr10	374105	374758	12.5429
chr10	375322	375736	6.44089
chr10	376450	377244	5.67859
chr10	378039	378529	7.60789
chr10	380490	380995	9.02032
chr10	381411	381575	3.2126
chr10	381988	383877	5.3954
chr10	384851	384946	2.58331
chr10	385718	385874	2.1069
chr10	387803	388015	3.00714
chr10	388469	388663	2.92305
chr10	389778	389810	2.67571
chr10	390179	390384	2.69167
chr10	390833	391127	3.4929
chr10	392018	392452	7.24965
chr10	393139	394097	5.00488
chr10	394735	394908	2.35082
chr10	396450	396847	4.79648
chr10	397486	397590	1.97516
chr10	398333	398490	4.05451
chr10	398799	399060	2.97784
chr10	399744	402145	8.09029
chr10	402596	402802	2.1115
chr10	403852	404091	2.24472
chr10	404889	405799	3.01095
chr10	406111	406249	2.23075
chr10	407060	407296	1.75945
chr10	408116	408583	3.27177
chr10	408941	409200	2.86115
chr10	409692	409874	3.62242
chr10	412116	412156	1.69516
chr10	413422	413577	2.99199
chr10	414342	415043	5.62622
chr10	415806	415972	3.72209
chr10	416441	416771	5.2092
chr10	417731	417923	2.45601
chr10	419278	419471	3.31844
chr10	422545	422908	2.45384
chr10	424276	424943	5.8694
chr10	425901	426013	2.68031
chr10	426682	426881	2.85964
chr10	429529	429815	3.70171
chr10	431536	431938	4.24296
chr10	434203	434362	3.14314
chr10	435251	435917	4.58807
chr10	436450	436822	4.43142
chr10	437197	437306	2.23349
chr10	437716	438099	2.84069
chr10	438976	439894	5.92421
chr10	441852	441997	2.45788
chr10	443082	444061	6.15583
chr10	445323	445680	4.83746
chr10	447935	448021	2.30479
chr10	448693	448811	2.54065
chr10	449616	449765	2.03247
chr10	450562	451101	3.28107
chr10	452176	452503	2.55751
chr10	452942	453019	2.34337
chr10	453697	454694	6.69255
chr10	456062	456345	3.41932
chr10	456922	457043	2.65058
chr10	457545	457652	2.41013
chr10	459445	461676	5.30263
chr10	462767	462972	2.73834
chr10	463376	464237	7.32146
chr10	466309	467695	6.43443
chr10	468329	469472	4.95006
chr10	469924	470606	4.93514
chr10	471447	471523	2.04157
chr10	472026	484465	25.1865
chr10	489574	489976	2.83499
chr10	490972	491146	1.79106
chr10	491573	491765	3.20377
chr10	492069	492226	3.74531
chr10	493314	493583	3.27286
chr10	494773	495478	3.02891
chr10	495788	497143	5.85573
chr10	497647	497782	2.36731
chr10	498204	498653	2.49999
chr10	499475	499512	2.26998
chr10	499906	500094	3.44309
chr10	500439	500534	2.24107
chr10	501057	501126	1.96677
chr10	501810	502053	2.49231
chr10	502530	502637	2.2574
chr10	503105	503216	2.34328
chr10	503782	504096	4.03101
chr10	506290	506361	2.34242
chr10	508422	508595	2.14319
chr10	509395	509439	2.51212
chr10	516456	517046	4.66113
chr10	518232	519774	7.80085
chr10	521486	521618	2.50416
chr10	522009	522484	3.01543
chr10	523604	524489	6.71971
chr10	524835	525421	3.67385
chr10	526843	527775	3.45045
chr10	528222	528722	4.87277
chr10	529916	530487	3.27491
chr10	531133	532270	7.19093
chr10	534510	535067	3.01023
chr10	536509	536972	4.35584
chr10	537608	538394	16.6714
chr10	539139	539902	3.06647
chr10	540203	541989	19.0169
chr10	542467	543568	9.02015
chr10	544804	544856	1.93632
chr10	545971	546180	3.86954
chr10	547602	547653	2.0642
chr10	550849	551038	3.50374
chr10	553587	553790	1.78797
chr10	555395	555573	2.2906
chr10	556777	557502	2.76781
chr10	560308	560364	2.13278
chr10	561247	561396	3.54083
chr10	561978	562328	4.05308
chr10	562847	562939	2.45687
chr10	564666	564799	2.03733
chr10	566734	567862	5.53223
chr10	568227	568468	2.16847
chr10	569080	569424	2.44738
chr10	569887	570077	2.68564
chr10	570884	572194	6.6903
chr10	572706	572998	2.99974
chr10	573404	573598	3.49356
chr10	575194	575843	4.92673
chr10	576161	576445	3.50514
chr10	578150	578234	3.41612
chr10	578821	578861	2.12865
chr10	580024	580374	2.09761
chr10	582043	582245	2.4216
chr10	582659	583601	8.51609
chr10	584666	585439	4.79625
chr10	585878	586036	3.56612
chr10	588469	589054	3.27843
chr10	590076	590253	3.10925
chr10	592012	592048	2.24061
chr10	593708	594427	8.19378
chr10	594770	595544	4.36647
chr10	596169	597073	4.1702
chr10	597590	598348	4.86746
chr10	599070	599147	2.79109
chr10	600290	600696	3.5997
chr10	602142	603263	4.68684
chr10	603567	603723	2.72686
chr10	605468	605991	4.16093
chr10	606353	606502	2.31431
chr10	606847	607260	3.24537
chr10	607821	607869	1.99146
chr10	608202	608749	5.23288
chr10	609180	610052	3.57624
chr10	612719	612963	3.22557
chr10	614693	615442	6.08387
chr10	617577	617995	4.46447
chr10	618441	618937	2.32364
chr10	619250	619398	2.35492
chr10	620762	622402	4.65727
chr10	622750	622886	3.58842
chr10	623271	623446	3.864
chr10	624025	624679	3.244
chr10	625042	625218	2.2289
chr10	627729	628521	4.51434
chr10	629254	629379	3.09951
chr10	632911	633855	3.16227
chr10	635292	636886	5.40277
chr10	637229	638269	4.74175
chr10	638805	639288	5.08623
chr10	639640	640219	7.12532
chr10	640705	641744	5.86979
chr10	642254	643573	6.38425
chr10	645607	645639	2.10929
chr10	646379	646580	2.38331
chr10	647474	648491	3.09326
chr10	648817	649027	3.25686
chr10	649432	650085	3.92929
chr10	652161	653019	6.13327
chr10	653333	653610	3.59322
chr10	654398	654545	2.7638
chr10	654918	655551	4.47718
chr10	655867	656250	3.96643
chr10	658954	659784	3.64692
chr10	660653	661220	2.73716
chr10	661543	661858	5.11085
chr10	662481	662687	3.16942
chr10	663667	664690	3.71259
chr10	665165	666591	5.4147
chr10	667753	668143	3.34084
chr10	669579	669691	2.14208
chr10	670737	670866	2.73201
chr10	672633	672768	2.9502
chr10	673515	673601	2.29724
chr10	673954	674074	2.15774
chr10	678675	678733	2.48231
chr10	680177	680305	2.19437
chr10	680977	681089	2.38666
chr10	682621	682649	2.37952
chr10	684786	685285	3.38146
chr10	686080	686320	2.3591
chr10	688073	688329	3.63753
chr10	690815	690956	2.11807
chr10	691901	691981	2.77154
chr10	692939	693449	3.15465
chr10	694573	694992	2.86993
chr10	695445	695931	6.11941
chr10	697586	697614	1.8087
chr10	698485	698614	1.9909
chr10	699274	699394	2.45523
chr10	701358	702200	4.93134
chr10	702626	703044	6.29977
chr10	704057	705354	7.76322
chr10	706224	706298	2.1551
chr10	706834	707028	2.39546
chr10	707579	708172	2.94589
chr10	710796	710848	1.59643
chr10	712390	712941	3.2828
chr10	713279	713569	4.66541
chr10	713999	715280	14.2903
chr10	717308	717494	5.19295
chr10	717816	718053	3.64013
chr10	719414	719474	2.15977
chr10	719940	720123	1.83706
chr10	720913	721182	3.60924
chr10	727429	727973	5.49165
chr10	728504	730213	5.49778
chr10	730580	731351	3.5969
chr10	731966	734793	10.7018
chr10	735195	736961	6.96729
chr10	737355	737559	2.62832
chr10	737942	738227	3.1975
chr10	738575	740028	6.78961
chr10	740516	740607	2.14879
chr10	741685	745639	13.4985
chr11	4	2898	13.2697
chr11	3979	4049	2.04689
chr11	5140	5527	5.09998
chr11	9667	10008	2.01863
chr11	15876	16282	4.27253
chr11	16618	17056	3.01304
chr11	17790	18305	2.80143
chr11	21066	21113	1.92442
chr11	21965	22441	5.56217
chr11	23306	24824	3.77053
chr11	25607	26320	2.92825
chr11	27036	27331	3.91303
chr11	29681	29713	2.50386
chr11	30035	30205	1.8823
chr11	32419	32565	2.68583
chr11	33324	33435	3.24177
chr11	33995	34211	2.74464
chr11	34546	34794	3.59657
chr11	35971	36223	2.02875
chr11	38901	39478	5.90827
chr11	40792	41119	3.53196
chr11	41797	42140	4.83088
chr11	42970	43441	2.66187
chr11	44142	44600	3.45752
chr11	45446	45536	1.7204
chr11	45951	46776	3.68211
chr11	47420	47567	2.63783
chr11	48494	48631	1.98418
chr11	49748	49914	3.64681
chr11	52252	52405	2.60238
chr11	52808	52956	2.99379
chr11	54182	55484	4.19146
chr11	56532	57300	9.54121
chr11	57663	57783	2.4897
chr11	58448	58493	1.83835
chr11	59083	59960	2.96624
chr11	63463	63581	1.90637
chr11	63889	64532	4.76028
chr11	65367	65446	2.09826
chr11	67442	68056	5.70999
chr11	69812	70403	8.5474
chr11	71189	71437	1.68505
chr11	72854	72894	2.29847
chr11	73340	73420	1.77843
chr11	74679	74772	2.5484
chr11	75123	75537	7.53479
chr11	76145	76252	2.33939
chr11	79957	81378	6.88876
chr11	82436	82557	2.00693
chr11	83068	83989	4.23256
chr11	84829	84932	2.46801
chr11	88487	88599	2.3106
chr11	89466	90345	4.46431
chr11	91407	91487	2.39628
chr11	92979	93174	2.41521
chr11	94546	94686	2.80513
chr11	95823	96051	2.54207
chr11	100103	100816	3.66217
chr11	101485	101863	3.95609
chr11	102707	103187	4.92788
chr11	104459	104919	3.75478
chr11	105336	105614	3.75016
chr11	106045	106117	2.12876
chr11	107547	107918	5.61948
chr11	108237	108517	4.17796
chr11	109419	110684	6.56999
chr11	111190	111909	3.45984
chr11	113916	113989	2.52179
chr11	114330	114766	4.23123
chr11	115380	115888	3.41819
chr11	116252	116884	5.77664
chr11	118267	118493	3.5224
chr11	118834	119071	2.90246
chr11	119670	119817	2.54537
chr11	124038	124175	2.76743
chr11	124508	124646	2.57291
chr11	125265	125349	2.10594
chr11	125850	126271	6.24932
chr11	129636	129854	2.29529
chr11	132393	133421	4.09452
chr11	134043	134150	2.33055
chr11	134481	135650	4.19782
chr11	138368	138577	3.0627
chr11	139878	139993	2.35635
chr11	140652	141531	10.365
chr11	142155	142784	4.42919
chr11	143352	143516	1.8273
chr11	144357	145328	10.5382
chr11	146138	146514	6.37525
chr11	147196	147656	5.5487
chr11	152297	152580	5.01797
chr11	153086	155190	5.10789
chr11	156355	156549	2.64728
chr11	157259	157494	3.08733
chr11	157995	158157	2.93081
chr11	158583	158863	3.675
chr11	159187	159279	1.71486
chr11	159652	160013	2.64243
chr11	160610	160747	2.27291
chr11	162260	163067	5.40138
chr11	163450	163506	2.53386
chr11	163898	164551	4.63078
chr11	165103	165367	2.99865
chr11	165671	166269	7.08732
chr11	168435	169489	5.07073
chr11	170354	170414	2.11103
chr11	171089	171217	2.41799
chr11	171796	171824	1.58492
chr11	172168	173840	4.23695
chr11	174499	175120	4.96722
chr11	175567	175993	4.56679
chr11	177349	177385	2.18572
chr11	180246	180672	4.04271
chr11	181293	181487	2.32024
chr11	182318	182410	2.31424
chr11	183661	183706	1.84956
chr11	184426	185223	4.94437
chr11	186597	186771	2.50414
chr11	190042	190171	2.71669
chr11	195590	195726	1.852
chr11	196108	196583	3.31096
chr11	197504	198097	3.29995
chr11	199022	199366	6.24541
chr11	199707	199735	1.72705
chr11	200697	201320	4.71479
chr11	201897	203120	17.172
chr11	204050	204266	2.64322
chr11	204617	204899	4.11966
chr11	205509	205629	2.14009
chr11	208675	209949	6.7403
chr11	210639	210783	2.36209
chr11	212127	212241	2.12494
chr11	212993	213248	3.81816
chr11	218659	218884	3.03111
chr11	219205	219740	2.75024
chr11	220296	221006	6.20994
chr11	222006	222523	3.32219
chr11	223014	223208	3.28393
chr11	224856	225277	4.50302
chr11	225579	225810	4.33336
chr11	226556	227184	3.31039
chr11	227527	227785	2.86878
chr11	228088	228352	2.90996
chr11	228928	229093	2.51605
chr11	230056	230501	2.71423
chr11	232034	232715	4.24384
chr11	234787	235070	3.89501
chr11	235470	235763	3.49555
chr11	238300	238583	2.69431
chr11	239073	239608	4.65385
chr11	239974	242370	10.7302
chr11	244914	245201	2.92701
chr11	245541	246240	4.95063
chr11	246698	247474	4.57839
chr11	249285	249902	4.1137
chr11	251008	251064	1.84049
chr11	251549	251794	3.18392
chr11	254483	255879	3.75207
chr11	256886	257365	3.71352
chr11	257905	258143	1.98244
chr11	258680	259817	13.6177
chr11	260640	262422	4.55062
chr11	263253	263281	1.8355
chr11	263780	263913	1.81766
chr11	265159	266122	3.90914
chr11	266500	266569	2.37451
chr11	269969	270971	3.72979
chr11	273006	273099	2.73938
chr11	273659	273937	2.72098
chr11	275418	275590	2.88563
chr11	276149	277477	6.83293
chr11	280332	282370	8.51832
chr11	283763	284087	4.08389
chr11	285640	285724	2.25065
chr11	289785	290137	5.52598
chr11	292457	293179	6.11197
chr11	295404	296136	7.51657
chr11	296745	296979	3.25591
chr11	300615	300788	2.50661
chr11	301989	302511	5.49486
chr11	304980	305524	3.47104
chr11	306814	308051	8.14451
chr11	309259	309299	2.60227
chr11	310308	310724	4.52247
chr11	311719	314223	16.5164
chr11	314780	315120	2.08432
chr11	316258	316386	2.67532
chr11	317225	317445	3.26951
chr11	318047	318163	2.26277
chr11	319039	319426	3.94301
chr11	323274	323389	2.54349
chr11	324095	324381	4.01097
chr11	325022	325298	3.03264
chr11	326425	327351	4.7127
chr11	328052	329045	3.43189
chr11	333805	333986	3.0947
chr11	334561	334721	2.05447
chr11	335703	338217	13.0939
chr11	338958	340228	7.5457
chr11	341299	341701	2.32099
chr11	342697	343015	4.28122
chr11	343499	344535	5.72555
chr11	345716	346322	3.44347
chr11	347016	347064	2.02289
chr11	347859	347895	1.98122
chr11	348219	348723	2.55943
chr11	352977	353010	2.57565
chr11	354171	354245	2.15747
chr11	356097	357538	6.2902
chr11	359750	360967	4.82148
chr11	361993	362794	3.06928
chr11	363292	364114	4.36041
chr11	364660	365453	4.50713
chr11	365944	366569	4.13691
chr11	367592	367752	2.34544
chr11	369585	369694	3.50797
chr11	370567	370839	3.47045
chr11	373203	373361	3.08299
chr11	374639	374920	2.92077
chr11	377273	378291	4.91593
chr11	379127	382987	10.1029
chr11	383536	383588	2.13522
chr11	383939	384933	4.29386
chr11	386026	387825	9.53318
chr11	390357	390816	3.11818
chr11	392359	392387	1.95583
chr11	392754	394545	6.25063
chr11	395593	396817	4.75948
chr11	397920	398545	3.8734
chr11	400370	402009	4.32012
chr11	403539	403689	3.51098
chr11	405399	405431	1.71279
chr11	406687	407227	2.59124
chr11	407557	407720	3.55784
chr11	408682	408745	1.89114
chr11	410284	410312	1.62549
chr11	414315	414379	2.09355
chr11	417279	417386	2.7794
chr11	418672	418819	1.9633
chr11	419232	419371	3.05094
chr11	420741	420935	4.05551
chr11	422640	423088	3.77912
chr11	424638	424694	1.94758
chr11	425074	425630	9.14838
chr11	425983	426068	2.08256
chr11	426473	426561	2.72489
chr11	426889	427159	3.40829
chr11	428345	428381	2.19523
chr11	429713	429869	3.77637
chr11	430336	430739	4.62386
chr11	431571	432368	8.119
chr11	433019	433216	2.57811
chr11	433976	434732	7.08453
chr11	435306	435517	3.18983
chr11	435840	436124	2.91857
chr11	442014	442042	1.98315
chr11	442410	442495	2.22571
chr11	443149	443277	2.50668
chr11	443838	444345	2.64155
chr11	446283	446388	2.24942
chr11	447511	447776	2.56897
chr11	449743	450767	4.52099
chr11	451207	451388	2.20437
chr11	453764	453942	2.33398
chr11	454687	454887	2.42382
chr11	456426	456501	2.63889
chr11	457677	459070	23.7001
chr11	459594	459854	3.83682
chr11	460998	461232	3.26655
chr11	462961	462993	2.1582
chr11	463820	464636	7.90826
chr11	465081	465852	4.68902
chr11	466901	467774	5.87913
chr11	468270	468826	3.10779
chr11	470836	470950	2.61713
chr11	471339	471375	2.07418
chr11	472659	472838	3.68947
chr11	474756	474886	2.13739
chr11	476208	476685	4.28421
chr11	477057	477267	2.84435
chr11	477895	478158	2.73643
chr11	478753	478872	2.60215
chr11	480684	480768	2.48547
chr11	481284	481409	2.17846
chr11	481728	481765	1.95895
chr11	482229	482688	3.79814
chr11	483341	483871	5.31968
chr11	484525	485024	2.99836
chr11	485431	485712	4.03514
chr11	486111	486317	3.72925
chr11	486660	487023	4.02319
chr11	487434	487474	1.98659
chr11	488672	489026	4.81982
chr11	489724	489913	2.33869
chr11	490605	491490	4.1682
chr11	494320	494715	3.46507
chr11	495428	495785	5.7498
chr11	496379	496496	1.99619
chr11	496904	497145	3.7559
chr11	497941	498144	4.02024
chr11	498795	499324	3.89674
chr11	499886	500134	1.83527
chr11	501172	501299	2.92837
chr11	502060	502731	6.1315
chr11	503846	504074	2.54261
chr11	505099	505203	2.24324
chr11	505790	506172	6.50761
chr11	506625	506832	1.87591
chr11	507830	508370	3.38164
chr11	508727	509463	4.38626
chr11	510147	510271	3.33234
chr11	511205	511797	4.25914
chr11	512779	513424	10.5333
chr11	513783	514589	5.43024
chr11	515039	516353	7.1896
chr11	516774	518010	24.0542
chr11	518864	521472	8.26441
chr11	522021	522312	3.33416
chr11	522921	524196	8.09515
chr11	524560	527016	5.18912
chr11	527636	527784	3.71986
chr11	528906	529135	3.42332
chr11	529805	529911	1.79118
chr11	531754	532133	5.22794
chr11	533324	533688	4.69775
chr11	535565	535747	3.27372
chr11	537669	537765	2.32347
chr11	538076	538365	3.87278
chr11	539883	539936	1.78094
chr11	543881	544096	2.47792
chr11	548624	548672	2.55201
chr11	550938	551023	2.2335
chr11	552356	552428	2.76022
chr11	554631	555843	6.4313
chr11	557847	558008	2.83608
chr11	558490	559108	3.34385
chr11	560572	561974	4.84334
chr11	563273	563405	1.84901
chr11	565366	566622	4.60084
chr11	567270	567561	3.40606
chr11	569551	570772	7.096
chr11	574682	574750	2.88025
chr11	576081	577876	4.51622
chr11	578481	578716	3.6042
chr11	580305	580401	2.40049
chr11	581163	581312	2.49858
chr11	582101	582265	2.34867
chr11	583428	583938	2.56709
chr11	586063	586321	3.05037
chr11	591083	591522	5.52687
chr11	592043	592238	2.49154
chr11	595931	596229	4.54163
chr11	596974	597095	2.62155
chr11	597707	599311	5.54544
chr11	600074	600270	2.86438
chr11	600586	600729	2.06964
chr11	602875	603398	2.71082
chr11	604712	604752	2.61099
chr11	605093	605591	6.51806
chr11	605965	606105	2.40637
chr11	606720	606980	3.68221
chr11	607582	607855	2.79253
chr11	608253	608426	2.65653
chr11	610333	610680	3.64926
chr11	612473	613650	8.25031
chr11	614078	614157	1.83118
chr11	614937	615296	5.89598
chr11	615801	616345	2.59995
chr11	616676	617156	4.71899
chr11	617560	617639	2.18605
chr11	619291	619383	2.86893
chr11	619741	619896	3.35063
chr11	623069	623437	2.37669
chr11	623979	624196	2.75505
chr11	624754	625158	5.02181
chr11	626006	626287	1.9366
chr11	626878	627328	7.15064
chr11	631224	631397	2.48352
chr11	632694	632909	2.20254
chr11	633361	633811	2.96331
chr11	634291	634607	2.73731
chr11	634973	635481	6.01402
chr11	636238	636494	2.62901
chr11	637185	637585	2.90043
chr11	639449	639531	1.87236
chr11	640156	640289	2.16935
chr11	641230	641935	3.73289
chr11	643939	644223	3.2367
chr11	646830	648193	9.16311
chr11	648516	648829	3.54738
chr11	649405	649525	2.50377
chr11	650300	650845	3.74491
chr11	652112	652254	2.15433
chr11	656033	656121	2.40994
chr11	659407	660120	5.59281
chr11	660506	661573	5.52391
chr11	661927	664293	9.63097
chr11	664670	666429	14.8164
chr12	0	14416	17.2831
chr12	15520	15941	2.33236
chr12	16370	16516	2.72284
chr12	18317	18497	2.47198
chr12	19021	19326	3.02473
chr12	21545	21801	3.4301
chr12	22142	22514	5.13543
chr12	24003	24791	3.63386
chr12	27684	27780	2.65875
chr12	28184	28361	2.91415
chr12	28759	29000	3.16041
chr12	29427	29455	2.04403
chr12	30675	31045	5.17402
chr12	34885	34938	2.35821
chr12	36404	36490	1.83191
chr12	37860	38313	3.74358
chr12	40774	40938	2.71494
chr12	42198	42270	1.98118
chr12	43139	43958	3.4542
chr12	44941	45186	3.42737
chr12	45578	45687	1.88319
chr12	46089	46245	2.29317
chr12	47427	47459	2.56945
chr12	48242	49722	6.87792
chr12	50027	50246	3.45232
chr12	50646	52974	4.83559
chr12	53652	53911	2.55474
chr12	55253	55321	2.29604
chr12	56471	56717	2.99277
chr12	57233	57397	2.11324
chr12	57846	57928	2.4462
chr12	61475	61706	3.10531
chr12	62530	62642	2.05903
chr12	63145	63884	4.94123
chr12	64665	64864	2.17036
chr12	65716	67307	6.74937
chr12	67640	67760	2.63121
chr12	68196	68360	2.74283
chr12	69543	69587	2.14119
chr12	71458	71720	3.67664
chr12	72095	72824	5.62693
chr12	74316	74564	3.17865
chr12	76278	76452	2.29578
chr12	76828	77116	2.69622
chr12	78413	78517	2.25488
chr12	78984	79229	3.50937
chr12	80965	81094	1.72961
chr12	81690	81726	1.82529
chr12	82450	82510	2.24926
chr12	84694	84737	2.50788
chr12	85183	85476	5.64622
chr12	85788	87101	4.08606
chr12	87991	88743	4.16034
chr12	89216	89330	2.11451
chr12	89662	90682	3.76816
chr12	91083	91293	2.81478
chr12	92037	92534	10.5318
chr12	94605	98015	6.84096
chr12	98690	99369	4.96195
chr12	100342	100614	4.82594
chr12	101373	101628	2.71372
chr12	101951	102051	1.88429
chr12	102886	102989	2.81611
chr12	103609	103810	2.62365
chr12	104677	104930	4.55182
chr12	105282	105555	8.16938
chr12	107104	107996	3.82874
chr12	108786	109095	2.81885
chr12	110193	110242	2.21357
chr12	110892	111351	4.47701
chr12	112739	112841	2.42817
chr12	113967	114224	3.99745
chr12	116211	116403	2.79068
chr12	118395	118449	2.40001
chr12	119433	119596	2.44805
chr12	120976	121107	2.47315
chr12	121687	122066	7.92245
chr12	123310	123685	6.17365
chr12	124161	124331	1.9411
chr12	124744	125719	4.01576
chr12	126591	127201	4.09275
chr12	128732	129480	3.7793
chr12	129948	130831	6.72197
chr12	131259	131651	3.74674
chr12	132142	132879	8.51314
chr12	133556	133993	3.60106
chr12	136351	136442	3.4807
chr12	136889	138565	4.18888
chr12	140425	140515	1.92154
chr12	142996	143137	2.12146
chr12	144628	144901	4.66879
chr12	146017	146109	1.93846
chr12	146876	147281	2.60159
chr12	148346	148573	1.91685
chr12	155722	156419	5.25501
chr12	156738	156857	1.84079
chr12	157452	158190	4.49252
chr12	159437	160227	4.02442
chr12	160987	161197	2.76452
chr12	162421	163549	3.23642
chr12	164090	164347	3.57363
chr12	165184	165360	2.05049
chr12	166446	167164	3.68395
chr12	167858	168519	8.34012
chr12	168903	168999	1.90335
chr12	170455	170659	3.07542
chr12	174053	174643	3.77447
chr12	175407	176081	3.31672
chr12	177016	177569	5.10137
chr12	178416	178516	1.9847
chr12	179128	179413	2.7737
chr12	180360	181072	5.28045
chr12	183077	183253	2.72121
chr12	184056	184277	1.99746
chr12	185402	185785	3.01631
chr12	186379	186569	3.16186
chr12	187627	188006	4.96443
chr12	188962	189770	5.88375
chr12	190378	190446	2.05538
chr12	191617	191896	3.76415
chr12	194304	196719	7.29614
chr12	197397	197535	2.30819
chr12	197891	198135	2.9257
chr12	198602	199480	11.6855
chr12	199924	200055	3.40975
chr12	200889	201127	3.45233
chr12	201760	202712	3.90208
chr12	203139	203290	2.70186
chr12	205122	205789	2.60691
chr12	206183	206788	3.70211
chr12	208237	208409	2.48115
chr12	208815	209409	4.60581
chr12	210376	210587	2.05527
chr12	211865	211901	1.65191
chr12	212429	213476	4.11608
chr12	214743	221115	26.4377
chr12	221482	222207	5.08415
chr12	222630	223038	4.02307
chr12	224424	224744	2.83061
chr12	226798	226846	1.82462
chr12	228428	228600	2.67731
chr12	228926	229468	4.88637
chr12	230043	230593	6.23207
chr12	231541	231956	5.18178
chr12	232415	237577	5.863
chr12	238456	238871	3.8301
chr12	242749	243363	6.42018
chr12	244685	245174	5.24542
chr12	245642	246635	5.00989
chr12	246962	247393	2.98318
chr12	247899	248177	3.29035
chr12	249327	249877	3.1359
chr12	250892	250954	2.72998
chr12	251976	252201	2.16193
chr12	252577	253067	6.7151
chr12	253587	253790	4.55333
chr12	254097	254893	7.27006
chr12	256455	256668	2.41099
chr12	257606	257903	2.54823
chr12	258623	258851	2.50652
chr12	259422	260638	7.71089
chr12	261729	262093	3.43834
chr12	262566	262873	5.17907
chr12	263500	264836	7.38711
chr12	265675	265814	3.66296
chr12	266166	266586	2.2073
chr12	268758	268943	4.65856
chr12	269434	270205	2.52888
chr12	271119	271389	4.20639
chr12	272011	272660	3.22032
chr12	273463	273588	1.869
chr12	274942	275227	4.41164
chr12	276810	277052	2.79463
chr12	277381	277485	2.62565
chr12	278357	279393	2.75177
chr12	280812	280941	3.42482
chr12	281346	281776	4.2477
chr12	282106	283702	11.9465
chr12	284708	284925	3.02723
chr12	286968	287940	4.67763
chr12	290687	290743	1.69
chr12	294241	294345	3.09538
chr12	294661	294885	2.15162
chr12	295512	295841	4.00475
chr12	296876	296964	2.01584
chr12	298031	298059	1.64991
chr12	298607	298892	2.59755
chr12	300283	300457	2.09895
chr12	300813	301159	3.25659
chr12	301521	301785	2.44031
chr12	304760	305047	3.01382
chr12	305514	305585	1.98783
chr12	306710	306822	1.73088
chr12	310606	310713	2.96769
chr12	312269	312457	3.04037
chr12	312826	313173	1.71517
chr12	314521	314561	2.05118
chr12	315052	315217	2.74329
chr12	317822	318290	5.45196
chr12	319885	320828	4.96014
chr12	322006	322198	2.69356
chr12	323851	324214	5.40486
chr12	324630	325355	4.24431
chr12	326387	326588	3.82431
chr12	327497	327899	4.52252
chr12	328812	329293	3.32087
chr12	329597	331064	9.47403
chr12	331679	332242	2.48374
chr12	335444	335747	3.42343
chr12	337138	337377	4.17113
chr12	338290	339054	5.73029
chr12	339564	340594	8.06686
chr12	341652	342341	4.28252
chr12	342898	345626	5.53787
chr12	346675	348451	6.89487
chr12	349735	351585	9.38704
chr12	354833	355532	3.48639
chr12	356586	357290	3.77781
chr12	360790	361411	3.69263
chr12	361978	362557	3.48345
chr12	362904	363112	1.59471
chr12	365746	365971	3.60462
chr12	367666	367775	2.40115
chr12	368858	370314	8.55938
chr12	371088	371228	1.84013
chr12	371613	371800	1.97493
chr12	372112	372421	3.91582
chr12	372751	372908	2.17529
chr12	373983	374405	12.9142
chr12	375202	376304	6.19633
chr12	377178	377361	2.22954
chr12	379290	380077	3.35214
chr12	382155	383189	5.0695
chr12	384190	384643	4.43653
chr12	385193	385595	2.54556
chr12	386421	386454	2.37151
chr12	388083	388990	4.50626
chr12	389317	390390	3.59358
chr12	390959	391015	2.0765
chr12	391407	391744	3.17858
chr12	393258	393860	2.75903
chr12	396487	396531	2.18559
chr12	396930	397226	2.88091
chr12	397910	398332	4.06846
chr12	399298	400794	5.46414
chr12	401547	401780	1.88944
chr12	402132	402428	4.34076
chr12	402747	402863	2.91925
chr12	404130	404167	1.89092
chr12	404668	405078	3.39044
chr12	406409	406557	2.18053
chr12	407904	408461	6.02761
chr12	409525	409653	2.72227
chr12	410608	412495	8.84028
chr12	415193	415414	3.43432
chr12	415814	416925	5.32723
chr12	418445	419226	3.79393
chr12	419732	420853	6.8274
chr12	421990	422617	5.99037
chr12	422963	423806	5.23762
chr12	424712	425425	6.53887
chr12	426751	427298	6.56342
chr12	427767	427811	1.93527
chr12	429144	429191	2.01817
chr12	429790	429886	2.07412
chr12	431904	432587	5.12657
chr12	433961	434635	10.0353
chr12	437378	438624	3.28897
chr12	440533	440951	5.80008
chr12	441711	442098	6.93666
chr12	443837	444114	2.85868
chr12	444969	445650	4.0216
chr12	447145	447286	2.8728
chr12	448142	449814	10.0386
chr12	450964	491182	38.7743
chr12	491929	492402	3.26971
chr12	494227	494302	2.68183
chr12	495053	495262	3.20355
chr12	498253	498438	2.23741
chr12	499069	499516	6.09629
chr12	500452	501875	5.27547
chr12	503523	503664	3.10737
chr12	504318	504496	3.79989
chr12	505842	505941	1.60606
chr12	506356	507705	5.86821
chr12	508809	510166	4.20461
chr12	511548	511613	2.03639
chr12	512832	513123	4.20964
chr12	513654	514865	8.05663
chr12	515861	516360	6.16608
chr12	516807	517266	6.84933
chr12	517623	517817	2.75277
chr12	518623	518726	3.00276
chr12	521051	521329	2.9299
chr12	522506	523258	3.57013
chr12	523808	523884	2.32854
chr12	524807	525098	3.41876
chr12	526248	526288	2.06143
chr12	527640	528001	6.36802
chr12	528964	529474	2.22982
chr12	530197	530484	2.53221
chr12	531425	531913	3.25292
chr12	537535	537777	4.40653
chr12	539209	539687	6.1901
chr12	540798	541575	4.82489
chr12	543026	543238	3.99684
chr12	544134	544670	3.32883
chr12	545217	546051	6.3754
chr12	547191	547703	7.56438
chr12	548066	548295	4.6965
chr12	548853	549152	3.329
chr12	551223	551286	2.29865
chr12	552279	553144	4.20711
chr12	553541	554015	5.88965
chr12	554677	555353	3.38602
chr12	556129	556460	5.73591
chr12	558551	558667	2.96718
chr12	558973	559258	4.95931
chr12	559855	560548	3.00909
chr12	560887	561155	3.78687
chr12	562600	562656	1.87427
chr12	563321	563655	5.45002
chr12	565239	565419	2.87404
chr12	566045	566317	2.64846
chr12	567065	568230	5.68764
chr12	569479	569591	2.29457
chr12	570619	571075	3.5517
chr12	572580	572856	5.66379
chr12	573224	574470	7.30911
chr12	576493	576732	4.35785
chr12	577721	577811	1.88717
chr12	578127	578323	3.49171
chr12	578652	578784	2.15187
chr12	579396	579847	3.32244
chr12	581312	581448	2.10406
chr12	582485	585405	8.73728
chr12	585895	586145	2.0676
chr12	590428	590761	3.85545
chr12	592016	599587	21.9735
chr12	600581	602436	6.13426
chr12	602953	603056	2.45652
chr12	603880	604223	3.15214
chr12	604739	604996	3.13428
chr12	606040	606068	2.40875
chr12	609902	610103	2.26604
chr12	612454	614851	7.13222
chr12	615761	616001	4.47776
chr12	616555	617236	2.93335
chr12	618867	618969	1.7355
chr12	619667	620062	3.95258
chr12	620642	620987	2.74196
chr12	622866	623006	1.86188
chr12	626376	627495	10.3239
chr12	627820	628946	7.70292
chr12	632115	632603	3.80049
chr12	636514	639942	8.01985
chr12	642817	643708	4.04356
chr12	644485	645599	6.06518
chr12	646166	647255	6.21393
chr12	647563	648073	3.668
chr12	650027	657465	24.4014
chr12	657842	658248	3.11984
chr12	658575	658732	2.925
chr12	659094	659638	2.7444
chr12	660042	660111	2.05637
chr12	660952	661190	4.06587
chr12	661954	662571	3.53528
chr12	662913	663649	4.05249
chr12	666898	667417	2.94665
chr12	667956	668622	4.33627
chr12	669509	669625	2.55473
chr12	671652	671765	2.80067
chr12	672094	672176	1.86678
chr12	673199	673648	2.57293
chr12	675436	675512	2.9568
chr12	676068	676315	2.38556
chr12	677835	678013	3.00545
chr12	682159	683914	8.67872
chr12	684455	684539	1.80065
chr12	687772	688539	9.75359
chr12	688974	689327	2.58095
chr12	690174	690258	2.12208
chr12	694568	694700	2.66238
chr12	695148	695893	3.83013
chr12	696597	696842	2.08563
chr12	697626	697944	3.67945
chr12	700017	701528	7.67651
chr12	702907	703510	3.95378
chr12	704049	704327	3.40598
chr12	705213	705275	2.50489
chr12	706796	707784	4.69432
chr12	708130	710225	5.77369
chr12	713034	713236	1.8353
chr12	713954	714625	5.40405
chr12	716639	716902	4.42164
chr12	717424	717490	2.03056
chr12	718634	719114	2.56305
chr12	719579	719887	3.16791
chr12	721616	722488	4.38361
chr12	723909	724631	4.22897
chr12	724933	725166	3.10089
chr12	725494	726313	4.72497
chr12	726718	727127	3.53562
chr12	727887	728206	3.81922
chr12	729688	730415	5.08478
chr12	730808	730875	2.08862
chr12	731590	732184	15.7048
chr12	734619	735160	4.55661
chr12	736576	736632	1.93193
chr12	739730	739762	1.71827
chr12	742860	742918	2.52237
chr12	744818	744875	2.38183
chr12	745186	745266	2.61416
chr12	748053	748315	2.73286
chr12	749644	749768	3.27667
chr12	750259	751085	4.42583
chr12	752547	753499	3.09761
chr12	755837	756956	3.82386
chr12	757276	757623	6.00473
chr12	758914	758957	1.78816
chr12	760301	760506	3.12898
chr12	763742	764745	5.03746
chr12	769441	769706	3.34828
chr12	771042	771269	2.00555
chr12	771640	771792	2.14047
chr12	773104	773350	3.26997
chr12	775358	775539	2.68201
chr12	776440	776975	5.65904
chr12	777316	777890	4.39142
chr12	778340	780178	6.46159
chr12	781210	781260	2.31905
chr12	782012	782871	3.35606
chr12	783349	783736	3.4829
chr12	784091	784306	3.37179
chr12	784982	785149	2.45213
chr12	785563	786193	6.43983
chr12	787004	787331	5.60927
chr12	788705	789380	9.10252
chr12	789705	789769	2.46616
chr12	790860	791283	6.3941
chr12	792501	792755	2.28774
chr12	793720	794113	5.71701
chr12	794516	795025	3.98108
chr12	795977	796186	2.21646
chr12	796791	797429	6.94053
chr12	797799	797984	3.44748
chr12	798829	799078	2.82764
chr12	800074	800155	2.20797
chr12	801615	802109	2.92118
chr12	803097	803761	4.67653
chr12	804423	804590	2.61843
chr12	805864	806980	6.31163
chr12	810248	811141	4.94921
chr12	811494	811827	4.35343
chr12	813647	813695	1.7587
chr12	814227	815003	4.71384
chr12	815352	815396	2.52054
chr12	816903	818492	18.2189
chr12	821398	821434	2.1347
chr12	823236	824483	12.516
chr12	825020	825050	2.56848
chr12	826691	828705	7.3062
chr12	829172	829300	2.46287
chr12	829951	829979	2.06475
chr12	830337	830849	4.06107
chr12	831856	831937	2.34168
chr12	832337	833581	2.88439
chr12	834993	835045	1.99017
chr12	835865	836211	4.96279
chr12	837026	837470	1.951
chr12	838921	839328	2.69154
chr12	840240	840500	2.38272
chr12	843078	843243	2.50819
chr12	843549	843769	2.71216
chr12	844820	844868	1.57075
chr12	847520	847882	3.85504
chr12	849357	850016	3.47599
chr12	851076	851342	4.15115
chr12	852192	852440	3.88088
chr12	854560	854680	2.78487
chr12	857375	857843	3.28146
chr12	861060	861272	2.50387
chr12	862978	863626	4.96996
chr12	865118	865206	2.19608
chr12	865815	865942	2.13378
chr12	866566	867364	4.59332
chr12	868375	868608	3.8315
chr12	869175	869508	5.09539
chr12	870774	871456	4.46925
chr12	872676	872985	4.53394
chr12	873463	873692	4.66315
chr12	874660	874898	2.69313
chr12	876321	876399	1.93639
chr12	877210	878168	5.4764
chr12	878938	879195	2.76067
chr12	879704	879791	2.40777
chr12	880838	880979	2.1236
chr12	881989	882395	5.55687
chr12	882902	882962	2.65738
chr12	883318	883419	2.23265
chr12	883887	884148	2.77844
chr12	885268	885313	2.26261
chr12	886354	886732	3.77993
chr12	887288	887869	3.79378
chr12	892042	892594	3.5159
chr12	892973	893526	3.92477
chr12	897112	897352	4.3996
chr12	898794	900208	6.12651
chr12	900898	901025	2.95871
chr12	901688	901785	2.65114
chr12	903763	904749	7.58115
chr12	905243	905671	3.04529
chr12	906701	906913	3.63342
chr12	909264	909498	2.43994
chr12	913170	913412	2.31401
chr12	913774	914039	2.70877
chr12	918151	918361	4.22657
chr12	919023	921074	5.82518
chr12	921454	921555	2.67933
chr12	922970	923176	2.88044
chr12	923562	923802	4.41987
chr12	924104	924540	4.48466
chr12	924923	925559	3.45939
chr12	926034	927321	4.37654
chr12	927888	927958	1.99211
chr12	930238	931152	4.02387
chr12	932293	932359	2.33243
chr12	934347	934475	2.63485
chr12	936074	936325	1.91461
chr12	936697	936966	3.81656
chr12	937963	938427	2.52528
chr12	940353	940602	2.68163
chr12	941111	947246	20.2448
chr12	947714	948078	5.60155
chr12	948560	948592	2.08887
chr12	949389	949551	2.21125
chr12	949979	950189	2.3097
chr12	951339	951805	4.07392
chr12	952152	953293	5.07302
chr12	955777	955841	1.62552
chr12	957691	958132	3.6816
chr12	959949	960235	2.57061
chr12	961649	961817	2.80874
chr12	962283	963494	3.02982
chr12	964980	966084	5.15197
chr12	967700	967840	4.0559
chr12	969886	970161	2.32663
chr12	974822	974894	1.80283
chr12	975911	982194	21.079
chr12	986710	988247	7.41165
chr12	989436	989638	2.00682
chr12	989986	990401	7.31169
chr12	991165	991205	2.47701
chr12	993341	993539	2.41733
chr12	994642	994876	3.23024
chr12	997516	998044	4.55934
chr12	998435	999304	5.8735
chr12	1000587	1000655	2.74577
chr12	1001338	1001915	2.52187
chr12	1002582	1002891	3.79274
chr12	1003285	1005170	6.87995
chr12	1006197	1007280	3.51664
chr12	1008776	1008944	2.22878
chr12	1009613	1009831	3.17829
chr12	1010135	1010235	2.75175
chr12	1011203	1012586	9.87299
chr12	1013238	1014335	6.91366
chr12	1015545	1016123	3.26954
chr12	1016998	1017197	2.64491
chr12	1017504	1017734	2.9761
chr12	1019750	1020066	2.6248
chr12	1021371	1022068	4.43651
chr12	1022723	1022806	1.64192
chr12	1023394	1023548	2.38439
chr12	1025040	1025684	4.40376
chr12	1026626	1026784	3.72815
chr12	1028234	1028282	1.98293
chr12	1028960	1029627	4.95758
chr12	1030020	1030391	4.59119
chr12	1030836	1030965	2.65009
chr12	1031402	1032032	5.10423
chr12	1035552	1035757	2.90391
chr12	1036845	1036933	2.35828
chr12	1037968	1038720	8.22585
chr12	1042843	1042943	3.36897
chr12	1043259	1043350	2.81936
chr12	1045474	1045594	2.83124
chr12	1047422	1047587	1.98354
chr12	1049409	1049477	2.55431
chr12	1051278	1051421	3.09128
chr12	1051954	1052482	5.69314
chr12	1053002	1053327	3.88338
chr12	1055931	1056027	2.30356
chr12	1056447	1056519	2.34074
chr12	1057702	1057839	3.64875
chr12	1059456	1059652	3.81628
chr12	1060913	1060999	1.87695
chr12	1061869	1078149	20.5525
chr13	0	8379	19.9665
chr13	9343	9744	5.41431
chr13	10557	10620	1.97985
chr13	12653	12822	2.85427
chr13	13381	14888	6.94072
chr13	15348	15391	1.78668
chr13	15989	16967	2.93801
chr13	18268	18384	2.228
chr13	18748	18991	3.8331
chr13	19328	19416	2.26892
chr13	20877	20977	1.92874
chr13	21530	21762	1.86232
chr13	22233	22476	4.25958
chr13	23049	23397	3.84812
chr13	23837	23912	1.761
chr13	24909	25284	3.70234
chr13	25893	25953	1.68147
chr13	26363	27258	5.43465
chr13	27578	28149	5.95597
chr13	30784	31131	3.53697
chr13	31923	32196	3.11128
chr13	36178	36390	2.38855
chr13	36884	37127	3.67987
chr13	39231	39500	2.93755
chr13	40293	40855	4.29496
chr13	41636	43250	6.79772
chr13	44675	44767	2.97317
chr13	45181	45463	3.75074
chr13	47372	48419	6.6679
chr13	49781	49930	3.27934
chr13	50573	50614	1.83086
chr13	51981	52239	3.0076
chr13	53350	53541	2.02509
chr13	53997	54073	2.17346
chr13	57093	57972	3.38733
chr13	61259	61544	4.05531
chr13	61936	62072	2.33927
chr13	62543	62732	2.18872
chr13	65821	65934	2.09354
chr13	66563	66757	2.69396
chr13	68342	68921	5.31014
chr13	71001	71103	2.51281
chr13	71501	71744	2.64122
chr13	72243	72416	1.91982
chr13	73360	73844	2.63142
chr13	74913	75193	2.92395
chr13	75758	76982	3.21655
chr13	77479	77720	3.61847
chr13	78513	78593	2.21024
chr13	79582	79620	1.8639
chr13	80590	80765	2.56773
chr13	81764	82577	2.2988
chr13	83281	83557	2.62422
chr13	84308	86240	6.09425
chr13	86646	86934	4.22533
chr13	88903	89007	1.90167
chr13	90199	90484	2.80618
chr13	92976	94984	7.34236
chr13	95693	95914	2.74319
chr13	96280	96571	5.17208
chr13	97535	98459	6.24555
chr13	98942	99003	2.33925
chr13	99779	100216	3.36131
chr13	100697	101211	4.35054
chr13	101830	102358	3.04773
chr13	103276	104057	5.2208
chr13	105876	106099	3.15082
chr13	109026	109082	2.14814
chr13	111090	111778	4.56484
chr13	112095	112150	1.58402
chr13	112535	113009	5.7032
chr13	114570	114847	2.25349
chr13	115269	115324	2.64622
chr13	116260	116374	2.30063
chr13	119413	119583	2.341
chr13	120161	122170	9.61142
chr13	122560	123141	5.93386
chr13	125148	125433	2.8264
chr13	126307	126603	4.76898
chr13	127282	127414	2.52257
chr13	130035	130419	3.94602
chr13	130934	131173	2.72619
chr13	131493	132223	8.06054
chr13	133720	133922	3.62491
chr13	134973	135203	3.56669
chr13	135823	136417	4.07732
chr13	137458	137533	1.83279
chr13	137979	138027	1.90663
chr13	138750	139038	3.44345
chr13	139914	140087	2.03554
chr13	140844	140913	1.90733
chr13	141483	142293	4.13698
chr13	143140	143225	2.80815
chr13	144208	144846	6.64336
chr13	145248	145958	5.56723
chr13	146970	148136	7.28009
chr13	148513	148834	2.72732
chr13	149153	149738	2.43366
chr13	150124	150286	2.72957
chr13	152621	153039	3.3807
chr13	154368	154564	2.72068
chr13	155884	157605	3.28283
chr13	159269	160524	5.49834
chr13	160872	161479	2.57516
chr13	164965	165703	4.117
chr13	166772	167043	1.97592
chr13	167652	167866	3.21159
chr13	168267	169792	19.3665
chr13	170236	171164	4.92251
chr13	171571	172086	6.23614
chr13	172588	172814	3.64586
chr13	174022	174649	6.64516
chr13	175695	175992	4.4683
chr13	176488	176749	3.2068
chr13	178085	178286	2.4876
chr13	179240	179520	3.08895
chr13	180215	180267	3.0882
chr13	180647	180806	3.54324
chr13	183007	183095	1.98679
chr13	183462	190306	22.8166
chr13	191230	192619	6.60684
chr13	194441	194558	2.81139
chr13	195587	195615	2.09318
chr13	196009	202596	22.6548
chr13	204298	205424	6.89492
chr13	206222	206940	7.0967
chr13	208113	210002	6.14257
chr13	210696	211181	4.18528
chr13	211884	211982	3.23815
chr13	212361	213206	7.41335
chr13	213536	213884	5.5208
chr13	216514	217127	5.81954
chr13	219553	219613	2.42309
chr13	220140	220860	8.01356
chr13	223102	223370	3.66866
chr13	224446	225288	5.57904
chr13	226321	226651	3.37764
chr13	227858	228082	2.69693
chr13	229546	229643	2.9644
chr13	230101	230895	4.18133
chr13	232526	233022	2.96039
chr13	234352	234963	3.77289
chr13	235476	235540	2.26749
chr13	236130	236178	1.94891
chr13	236610	236927	4.24204
chr13	238123	238857	8.54629
chr13	240145	240286	3.74053
chr13	240728	241295	7.35597
chr13	241600	241717	2.6777
chr13	242284	242313	1.8396
chr13	242710	243099	5.16362
chr13	243465	243585	2.2355
chr13	244506	244649	2.68792
chr13	245092	245245	2.76026
chr13	245734	246956	5.0683
chr13	247884	248643	5.98722
chr13	249874	250120	2.4512
chr13	250682	250946	3.03365
chr13	252152	253212	8.08541
chr13	253720	253984	2.28101
chr13	254839	255183	6.52408
chr13	256623	257997	4.54855
chr13	258470	260250	8.79983
chr13	261059	261176	2.19977
chr13	262876	263008	2.11235
chr13	267169	267520	4.76912
chr13	269492	269984	4.21061
chr13	270956	271285	3.80992
chr13	271934	272217	2.40059
chr13	275326	275615	2.74702
chr13	276219	276331	3.14502
chr13	277323	277385	1.74344
chr13	277861	278111	3.50287
chr13	278448	278480	1.86229
chr13	279045	279291	4.29059
chr13	280597	281443	7.64427
chr13	282052	282141	3.09707
chr13	284092	284400	5.00699
chr13	284864	284952	2.38263
chr13	287111	287221	2.43827
chr13	288001	288560	4.33283
chr13	289130	289645	7.98419
chr13	290534	290960	7.42071
chr13	292500	292704	1.7751
chr13	293336	293533	3.11903
chr13	296937	297673	3.60274
chr13	299260	299509	2.50035
chr13	300631	300859	3.43771
chr13	303261	305825	6.29429
chr13	308285	308477	3.28152
chr13	309515	309765	3.083
chr13	310566	310690	2.25523
chr13	311488	311540	2.93636
chr13	312517	312815	5.1805
chr13	314635	314876	4.03625
chr13	315369	315505	2.75572
chr13	316970	317135	2.471
chr13	318145	318281	3.08514
chr13	318873	319165	2.64627
chr13	319837	320067	4.58365
chr13	320729	321335	3.67494
chr13	323357	324322	3.60777
chr13	325367	325399	2.17656
chr13	326437	326497	1.79526
chr13	327341	327521	2.13539
chr13	330005	330345	2.11073
chr13	331128	331262	2.58457
chr13	331919	333490	6.33169
chr13	334060	334102	1.94499
chr13	335642	335909	2.33605
chr13	339006	339423	2.82907
chr13	340686	340884	4.23414
chr13	341669	342160	3.45156
chr13	344413	344616	3.7983
chr13	344952	344980	1.99665
chr13	345312	345582	3.51381
chr13	346119	346489	4.08773
chr13	346905	347056	2.89238
chr13	347408	347700	4.00769
chr13	348083	351040	8.02434
chr13	351383	351575	2.14
chr13	351984	352052	2.76543
chr13	353304	356009	5.25014
chr13	356820	364652	24.7542
chr13	365307	365954	3.77821
chr13	366541	366915	4.57871
chr13	367709	369283	5.06188
chr13	369924	370249	2.14206
chr13	372100	379609	28.4083
chr13	381437	382386	2.62569
chr13	382708	383064	4.85841
chr13	383503	383535	1.82975
chr13	384533	384770	2.28091
chr13	385153	386032	5.42461
chr13	386884	387339	6.19532
chr13	390021	390205	1.97821
chr13	390539	390949	2.22039
chr13	391866	391977	2.54858
chr13	392326	392593	2.67422
chr13	397071	397906	5.63053
chr13	398211	398360	2.4088
chr13	398835	398871	3.23567
chr13	400996	401024	2.09493
chr13	403806	403860	1.85061
chr13	404669	404915	2.76142
chr13	405437	406880	3.98154
chr13	408840	409930	5.27356
chr13	410263	410686	4.03802
chr13	411101	411486	4.96846
chr13	412119	412189	1.74059
chr13	412837	413024	4.2453
chr13	413328	414157	4.17401
chr13	414663	414822	2.00077
chr13	415517	415708	5.99262
chr13	416215	416403	2.64196
chr13	416786	416968	2.90575
chr13	418718	418770	2.55286
chr13	420296	420792	8.74811
chr13	422026	422649	2.90872
chr13	424275	424955	4.82925
chr13	427345	427530	3.44597
chr13	428101	428149	2.43047
chr13	428627	429447	3.20157
chr13	430570	431381	4.67837
chr13	433545	434291	3.41616
chr13	435018	435616	2.92464
chr13	438100	438205	1.86449
chr13	438514	438719	2.88208
chr13	441671	441773	2.06405
chr13	442153	443256	7.21133
chr13	443962	444183	2.98732
chr13	445598	446259	5.05757
chr13	447120	447218	3.33604
chr13	450819	451442	6.41432
chr13	452862	453077	2.46344
chr13	454618	454795	2.41861
chr13	455422	455531	2.3558
chr13	459223	459587	2.18353
chr13	460500	460644	2.50331
chr13	462431	462636	2.02916
chr13	463033	463946	8.64148
chr13	465113	465267	2.87885
chr13	467938	468382	3.73674
chr13	470140	470768	3.30334
chr13	471719	472576	5.64439
chr13	473862	475535	3.66247
chr13	478509	478831	5.02305
chr13	480318	481277	6.73461
chr13	482767	483037	4.99879
chr13	484546	484811	3.61207
chr13	485685	485959	3.46028
chr13	489999	490320	3.90088
chr13	492323	492575	3.55176
chr13	493016	493798	6.26712
chr13	494108	494833	5.61033
chr13	496098	497307	6.53016
chr13	499805	499999	2.48686
chr13	501143	501830	4.15384
chr13	502322	502521	2.62002
chr13	503656	505228	14.5895
chr13	506982	507443	4.23549
chr13	507866	508133	2.40019
chr13	508569	509435	3.36685
chr13	509901	510521	4.8419
chr13	511223	511712	5.03039
chr13	512097	512551	2.3881
chr13	512942	513190	3.43415
chr13	513697	513954	1.96197
chr13	514648	516149	3.80969
chr13	516567	517033	3.14524
chr13	523960	525248	6.73812
chr13	526393	526485	2.69899
chr13	529142	529701	2.99835
chr13	533382	534000	3.11946
chr13	534332	534717	7.55827
chr13	535037	535886	4.51127
chr13	536218	536305	1.61743
chr13	538519	538973	2.71781
chr13	539412	540083	4.00498
chr13	541337	541633	3.70244
chr13	542199	542518	5.52672
chr13	543249	543281	1.99372
chr13	544445	544860	4.8655
chr13	545193	546030	4.32183
chr13	548213	548322	2.60097
chr13	548745	549079	3.36278
chr13	550200	550503	3.75119
chr13	551792	552069	3.9779
chr13	553531	553947	4.3204
chr13	554564	554611	2.57318
chr13	555610	555897	2.11737
chr13	556498	556728	3.02096
chr13	559437	559954	2.86575
chr13	560277	560772	2.65801
chr13	561663	561814	2.28842
chr13	562417	562873	3.59685
chr13	563460	563797	5.43967
chr13	568170	568239	3.23527
chr13	569762	570176	3.06596
chr13	570943	571153	2.8583
chr13	572785	573143	2.97846
chr13	574496	574988	2.92924
chr13	575336	575668	2.62274
chr13	576115	576396	2.89716
chr13	577291	577507	2.76491
chr13	578207	578505	4.60345
chr13	580528	581301	4.86494
chr13	582000	582547	3.77555
chr13	582954	583441	5.4116
chr13	584643	584783	2.64259
chr13	586223	586949	6.44364
chr13	587445	589093	9.92023
chr13	590692	590894	3.15304
chr13	591224	592529	7.63592
chr13	592890	593090	2.1743
chr13	593531	593711	3.35856
chr13	594139	594528	2.98041
chr13	595708	596475	3.48476
chr13	598472	598732	3.28713
chr13	599049	599176	1.7419
chr13	599625	599938	3.50184
chr13	600604	600746	3.46186
chr13	601786	602069	4.94519
chr13	602742	602901	2.71511
chr13	604219	604308	2.15035
chr13	604889	605258	4.61173
chr13	607047	608163	4.14301
chr13	608833	611161	13.8556
chr13	612733	612872	1.98718
chr13	615435	615642	2.63694
chr13	616981	617289	3.6177
chr13	618375	618765	4.5911
chr13	619445	619647	2.31393
chr13	620071	620639	5.3528
chr13	621776	622054	2.68387
chr13	622942	626888	7.71938
chr13	627384	627769	4.37109
chr13	630286	630380	2.45774
chr13	632735	634236	5.81145
chr13	636702	637078	3.5162
chr13	637401	637542	2.83265
chr13	638247	638652	3.42711
chr13	639595	640022	4.82742
chr13	641104	641140	1.94106
chr13	642073	642567	5.13701
chr13	642936	642995	2.29309
chr13	643567	644167	4.81866
chr13	644815	645339	6.06398
chr13	645970	646133	4.429
chr13	649203	649420	2.63745
chr13	650274	650560	3.4911
chr13	651032	651267	3.03517
chr13	651735	651891	3.24899
chr13	652308	652556	5.06678
chr13	653875	654833	4.31564
chr13	655211	655579	6.28877
chr13	658658	659018	5.8371
chr13	659381	659429	1.71037
chr13	659980	660891	3.13088
chr13	662492	662634	1.88001
chr13	663526	663608	2.13466
chr13	665258	665505	2.74443
chr13	666533	667008	3.54955
chr13	667459	670525	5.99927
chr13	672965	673659	4.72036
chr13	674261	674888	5.62719
chr13	675652	676813	6.3858
chr13	677120	677931	6.1042
chr13	678264	678865	3.06595
chr13	681677	681717	1.91863
chr13	682671	683070	4.32318
chr13	683463	683613	2.93642
chr13	684521	684984	3.42869
chr13	685297	685368	2.40578
chr13	688205	688585	2.5436
chr13	689668	689892	3.43412
chr13	691605	691833	2.93743
chr13	694319	694675	5.43634
chr13	695831	695964	3.13348
chr13	696275	696463	3.06559
[truncated: 5,151 more rows]
